# Supplementary material
Source: PubMed Central journal article supplement (PMC1069710)

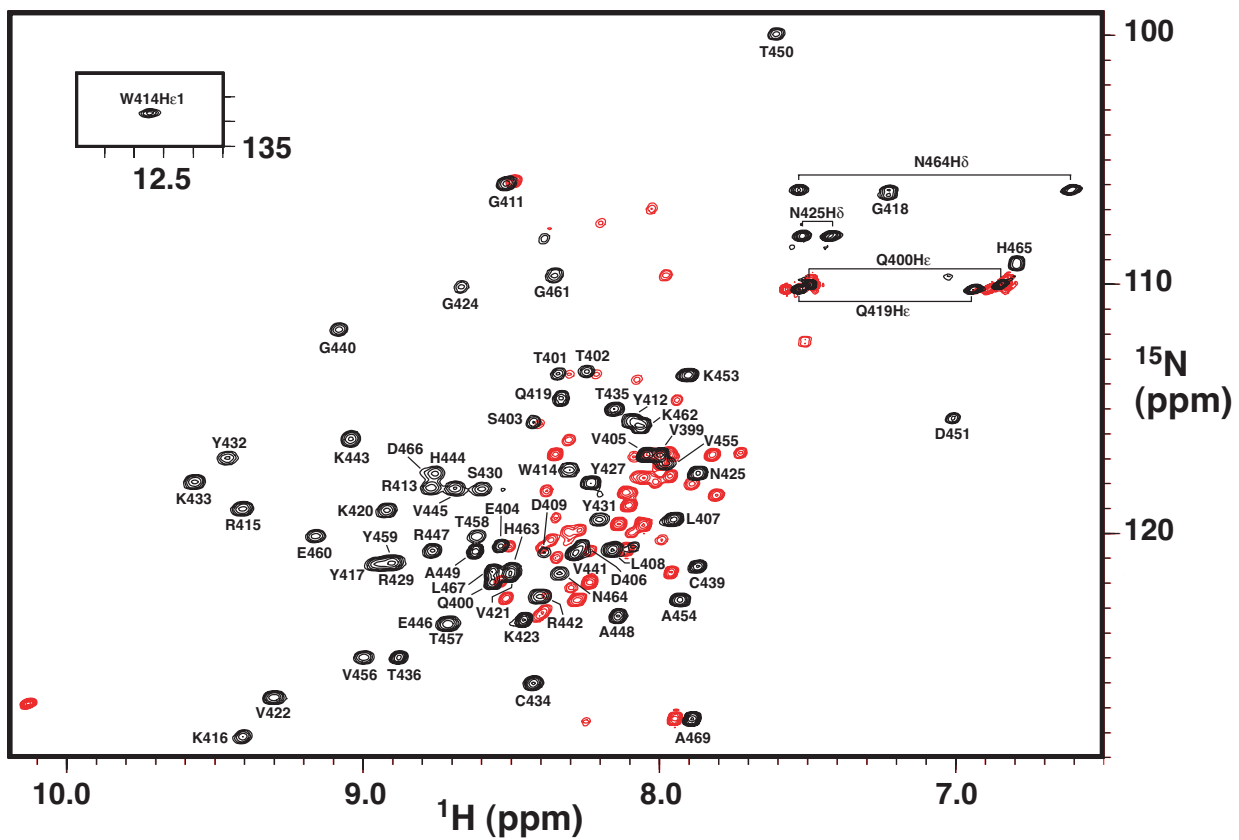

Fig. 1S (Yamasaki et al.)

Supplement: plntcell_tpc.104.026435_1.pdf [file plntcell_tpc.104.026435_1.pdf]
